# Supplementary material
Source: PubMed Central journal article supplement (PMC6990757)

## Supplementary Online Content

McCarthy EP, Ogarek JA, Loomer L, et al. Hospital transfer rates among US nursing home residents with advanced illness before and after initiatives to reduce hospitalizations. *JAMA Intern Med*. Published online December 30, 2019. doi:10.1001/jamainternmed.2019.6130

**eTable 1.** Detailed Listing of ICD-9/ICD-10-CM Diagnosis Codes for Potentially Avoidable Conditions and for Serious Bone Fractures. (Pages 2-21)

**eTable 2.** Total Number of Hospital Transfers Among Nursing Home Residents With Advanced Illness by Cohort Year (Page 22)

**eFigure.** Percent of All Transfers That Were Potentially Avoidable by Cohort Year (Page 23)

This supplementary material has been provided by the authors to give readers additional information about their work.

**eTable 1.** Detailed Listing of ICD-9/ICD-10-CM Diagnosis Codes for Potentially Avoidable Conditions and for Serious Bone Fractures

| ICD-9-CM Diagnosis Code                        |                                                          | ICD-10-CM Diagnosis Code |                                                             |
|------------------------------------------------|----------------------------------------------------------|--------------------------|-------------------------------------------------------------|
| <b>Potentially Avoidable Condition: Sepsis</b> |                                                          |                          |                                                             |
| 0031                                           | Salmonella septicemia                                    | A021                     | Salmonella sepsis                                           |
| 0380                                           | Streptococcal septicemia                                 | A409                     | Streptococcal sepsis, unspecified                           |
| 03810                                          | Staphylococcal septicemia unspecified                    | A412                     | Sepsis due to unspecified staphylococcus                    |
| 03811                                          | Methicillin susceptible Staphylococcus Aureus septicemia | A4101                    | Sepsis due to methicillin susceptible staphylococcus aureus |
| 03812                                          | Methicillin resistant Staphylococcus Aureus septicemia   | A4102                    | Sepsis due to methicillin resistant staphylococcus aureus   |
| 03819                                          | Other staphylococcal septicemia                          | A411                     | Sepsis due to other specified staphylococcus                |
| 0382                                           | Pneumococcal septicemia                                  | A403                     | Sepsis due to streptococcus pneumoniae                      |
| 0383                                           | Septicemia due to anaerobes                              | A414                     | Sepsis due to anaerobes                                     |
| 03840                                          | Septicemia due to gram-negative organism unspecified     | A4150                    | Gram-negative sepsis, unspecified                           |
| 03841                                          | Septicemia due to Hemophilus Influenzae [H. Influenzae]  | A413                     | Sepsis due to Hemophilus Influenzae                         |
| 03842                                          | Septicemia due to Escherichia Coli [E. Coli]             | A4151                    | Sepsis due to Escherichia Coli [E. Coli]                    |
| 03843                                          | Septicemia due to Pseudomonas                            | A4152                    | Sepsis due to Pseudomonas                                   |
| 03844                                          | Septicemia due to Serratia                               | A4153                    | Sepsis due to Serratia                                      |
| 03849                                          | Other septicemia due to gram-negative organisms          | A4159                    | Other gram-negative sepsis                                  |
| 0388                                           | Other specified septicemias                              | A4189                    | Other specified sepsis                                      |
| 0389                                           | Unspecified septicemia                                   | A419                     | Sepsis, unspecified organism                                |

| ICD-9-CM<br>Diagnosis<br>Code                     |                                                                | ICD-10-CM<br>Diagnosis<br>Code |                                                                |
|---------------------------------------------------|----------------------------------------------------------------|--------------------------------|----------------------------------------------------------------|
| 78552                                             | Septic shock                                                   | A427                           | Actinomycotic sepsis                                           |
|                                                   |                                                                | A5486                          | Gonococcal sepsis                                              |
|                                                   |                                                                | B377                           | Candidal sepsis                                                |
|                                                   |                                                                | R6520                          | Severe sepsis without septic shock                             |
|                                                   |                                                                | R6521                          | Severe sepsis with septic shock                                |
| <b>Potentially Avoidable Condition: Pneumonia</b> |                                                                |                                |                                                                |
| 481                                               | Pneumococcal pneumonia                                         | J13                            | Pneumonia due to Streptococcus Pneumoniae                      |
| 4822                                              | H. Influenzae pneumonia                                        | J14                            | Pneumonia due to Hemophilus influenza                          |
| 48230                                             | Streptococcal pneumonia unspecified                            | J15211                         | Pneumonia due to Methicillin susceptible Staphylococcus aureus |
| 48231                                             | Pneumonia due to Streptococcus, group A                        | J15212                         | Pneumonia due to Methicillin resistant Staphylococcus aureus   |
| 48232                                             | Pneumonia due to Streptococcus, group B                        | J153                           | Pneumonia due to streptococcus, group B                        |
| 48239                                             | Pneumonia due to other Streptococcus                           | J154                           | Pneumonia due to other streptococci                            |
| 48240                                             | Pneumonia due to other Streptococcus, unspecified              | J157                           | Pneumonia due to Mycoplasma pneumoniae                         |
| 48241                                             | Methicillin susceptible pneumonia due to Staphylococcus aureus | J159                           | Unspecified bacterial pneumonia                                |
| 48242                                             | Methicillin resistant pneumonia due to Staphylococcus aureus   | J160                           | Chlamydial pneumonia                                           |
| 48249                                             | Other Staphylococcus pneumonia                                 | J168                           | Pneumonia due to other specified infectious organisms          |
| 4829                                              | Bacterial pneumonia, unspecified                               | J180                           | Bronchopneumonia, unspecified organism                         |

| <b>ICD-9-CM<br/>Diagnosis<br/>Code</b>                             |                                            | <b>ICD-10-CM<br/>Diagnosis<br/>Code</b> |                                                          |
|--------------------------------------------------------------------|--------------------------------------------|-----------------------------------------|----------------------------------------------------------|
| 4830                                                               | Pneumonia due to mycoplasma pneumoniae     | J181                                    | Lobar pneumonia, unspecified organism                    |
| 4831                                                               | Pneumonia due to chlamydia pneumonia       | J188                                    | Other pneumonia, unspecified organism                    |
| 4838                                                               | Pneumonia due to other specified organism  | J189                                    | Pneumonia, unspecified organism                          |
| 485                                                                | Bronchopneumonia, organism unspecified     |                                         |                                                          |
| 486                                                                | Pneumonia, organism unspecified            |                                         |                                                          |
| <b>Potentially Avoidable Condition: Dehydration</b>                |                                            |                                         |                                                          |
| 2765                                                               | Hypovolemia                                | E860                                    | Dehydration                                              |
| 27650                                                              | Volume depletion                           | E861                                    | Hypovolemia                                              |
| 27651                                                              | Dehydration                                | E869                                    | Volume depletion, unspecified                            |
| 27652                                                              | Hypovolemia                                |                                         |                                                          |
| <i>For conditions below, Dehydration can be the secondary code</i> |                                            |                                         |                                                          |
| <b>Hyperosmolality and/or hypernatremia diagnosis</b>              |                                            |                                         |                                                          |
| 2760                                                               | Hyperosmolality                            | E870                                    | Hyperosmolality and hypernatremia                        |
| <b>Gastroenteritis diagnosis codes</b>                             |                                            |                                         |                                                          |
| 00861                                                              | Enteritis due to rotavirus                 | A080                                    | Rotaviral enteritis                                      |
| 00862                                                              | Enteritis due to adenovirus                | A0811                                   | Acute gastroenteropathy due to Norwalk agent             |
| 00863                                                              | Enteritis due to Norwalk virus             | A0819                                   | Acute gastroenteropathy due to other small round viruses |
| 00864                                                              | Enteritis due to other small round viruses | A082                                    | Adenoviral enteritis                                     |
| 00865                                                              | Enteritis due to calicivirus               | A0831                                   | Calicivirus enteritis                                    |
| 00866                                                              | Enteritis due to astrovirus                | A0832                                   | Astrovirus enteritis                                     |

| <b>ICD-9-CM<br/>Diagnosis<br/>Code</b>             |                                                                         | <b>ICD-10-CM<br/>Diagnosis<br/>Code</b> |                                                          |
|----------------------------------------------------|-------------------------------------------------------------------------|-----------------------------------------|----------------------------------------------------------|
| 00867                                              | Enteritis due to enterovirus, not elsewhere classified                  | A0839                                   | Other viral enteritis                                    |
| 00869                                              | Enteritis due to other viral enteritis                                  | A084                                    | Viral intestinal infection, unspecified                  |
| 0088                                               | Intestinal infection due to other organism, not elsewhere classified    | A088                                    | Other specified intestinal infections                    |
| 0090                                               | Infectious enteritis, not elsewhere classified                          | A09                                     | Infectious gastroenteritis and colitis, unspecified      |
| 0091                                               | Colitis, enteritis, and gastroenteritis of presumed infectious origin   | K523                                    | Indeterminate colitis                                    |
| 0092                                               | Infectious diarrhea, not elsewhere classified                           | K5289                                   | Other specified noninfective gastroenteritis and colitis |
| 0093                                               | Diarrhea of presumed infectious origin                                  |                                         |                                                          |
| 5589                                               | Other and unspecified noninfectious gastroenteritis and colitis         | K529                                    | Noninfective gastroenteritis and colitis, unspecified    |
| <b><i>Acute kidney failure diagnosis codes</i></b> |                                                                         |                                         |                                                          |
| 5845                                               | Acute kidney failure with tubular necrosis                              | N170                                    | Acute kidney failure with tubular necrosis               |
| 5846                                               | Acute kidney failure with acute cortical necrosis                       | N171                                    | Acute kidney failure with acute cortical necrosis        |
| 5847                                               | Acute kidney failure with medullary necrosis                            | N172                                    | Acute kidney failure with medullary necrosis             |
| 5848                                               | Acute kidney failure with other specified pathological lesion in kidney | N178                                    | Other acute kidney failure                               |
| 5849                                               | Acute kidney failure, unspecified                                       | N179                                    | Acute kidney failure, unspecified                        |
| 586                                                | Renal failure, unspecified                                              | N19                                     | Unspecified kidney failure                               |

| ICD-9-CM<br>Diagnosis<br>Code                                          |                                                                       | ICD-10-CM<br>Diagnosis<br>Code |                                                                         |
|------------------------------------------------------------------------|-----------------------------------------------------------------------|--------------------------------|-------------------------------------------------------------------------|
| 9975                                                                   | Surgical urinary complications,<br>not elsewhere classified           | N990                           | Postprocedural (acute) (chronic)<br>kidney failure                      |
| <b>Potentially Avoidable Condition: <i>Urinary Tract Infection</i></b> |                                                                       |                                |                                                                         |
| 59010                                                                  | Acute pyelonephritis without<br>lesion of renal medullary<br>necrosis | N10                            | Acute tubulo-interstitial nephritis                                     |
| 59011                                                                  | Acute pyelonephritis with lesion<br>of renal medullary necrosis       | N119                           | Chronic tubulo-interstitial<br>nephritis, unspecified                   |
| 5902                                                                   | Renal and perinephric abscess                                         | N12                            | Tubulo-interstitial nephritis, not<br>specified as acute or chronic     |
| 5903                                                                   | Pyeloureteritis cystica                                               | N151                           | Renal and perinephric abscess                                           |
| 59080                                                                  | Pyeloureteritis, not elsewhere<br>specified                           | N159                           | Renal tubulo-interstitial disease,<br>unspecified                       |
| 59081                                                                  | Pyelitis or pyelonephritis in<br>diseases classified elsewhere        | N16                            | Renal tubulo-interstitial disorders<br>in diseases classified elsewhere |
| 5909                                                                   | Infection of kidney, unspecified                                      | N2884                          | Pyelitis cystica                                                        |
| 5950                                                                   | Acute cystitis                                                        | N2885                          | Pyeloureteritis cystica                                                 |
| 5959                                                                   | Cystitis, unspecified                                                 | N2886                          | Ureteritis cystica                                                      |
| 5990                                                                   | Urinary tract infection, site not<br>specified                        | N3000                          | Acute cystitis without hematuria                                        |
|                                                                        |                                                                       | N3001                          | Acute cystitis with hematuria                                           |
|                                                                        |                                                                       | N3090                          | Cystitis, unspecified without<br>hematuria                              |
|                                                                        |                                                                       | N3091                          | Cystitis, unspecified with<br>hematuria                                 |
|                                                                        |                                                                       | N390                           | Urinary tract infection, site not<br>specified                          |
| <b>Potentially Avoidable Condition: <i>Heart Failure</i></b>           |                                                                       |                                |                                                                         |
| 39891                                                                  | Rheumatic heart failure                                               | I0981                          | Rheumatic heart failure                                                 |
| 40201                                                                  | Malignant hypertensive heart<br>disease with heart failure            | I110                           | Hypertensive heart disease with<br>heart failure                        |

| <b>ICD-9-CM<br/>Diagnosis<br/>Code</b> |                                                                                                                                                         | <b>ICD-10-CM<br/>Diagnosis<br/>Code</b> |                                                                                        |
|----------------------------------------|---------------------------------------------------------------------------------------------------------------------------------------------------------|-----------------------------------------|----------------------------------------------------------------------------------------|
| 40211                                  | Benign hypertensive heart disease with heart failure                                                                                                    | I130                                    | Hypertensive heart and CKD with HF and stage 1 through stage 4 CKD, or unspecified CKD |
| 40291                                  | Unspecified hypertensive heart disease with heart failure                                                                                               | I132                                    | Hypertensive heart and CKD with HF and with stage 5 CKD, or ESRD                       |
| 40401                                  | Hypertensive heart and chronic kidney disease, benign, without heart failure and with chronic kidney disease stage I through stage IV, or unspecified   | I501                                    | Left ventricular failure, unspecified                                                  |
| 40403                                  | Hypertensive heart and chronic kidney disease, malignant, with heart failure and with chronic kidney disease stage V or end stage renal disease         | I5020                                   | Unspecified systolic (congestive) heart failure                                        |
| 40411                                  | Hypertensive heart and chronic kidney disease, benign, with heart failure and with chronic kidney disease stage I through stage IV, or unspecified      | I5021                                   | Acute systolic (congestive) heart failure                                              |
| 40413                                  | Hypertensive heart and chronic kidney disease, benign, with heart failure and chronic kidney disease stage V or end stage renal disease                 | I5022                                   | Chronic systolic (congestive) heart failure                                            |
| 40491                                  | Hypertensive heart and chronic kidney disease, unspecified, with heart failure and with chronic kidney disease stage I through stage IV, or unspecified | I5023                                   | Acute on chronic systolic (congestive) heart failure                                   |
| 40493                                  | Hypertensive heart and chronic kidney disease, unspecified, with heart failure and chronic kidney disease stage V or end stage renal disease            | I5030                                   | Unspecified diastolic (congestive) heart failure                                       |

| <b>ICD-9-CM<br/>Diagnosis<br/>Code</b> |                                                                | <b>ICD-10-CM<br/>Diagnosis<br/>Code</b> |                                                                                        |
|----------------------------------------|----------------------------------------------------------------|-----------------------------------------|----------------------------------------------------------------------------------------|
| 4280                                   | Congestive heart failure                                       | I5031                                   | Acute diastolic (congestive) heart failure                                             |
| 4281                                   | Left heart failure                                             | I5032                                   | Chronic diastolic (congestive) heart failure                                           |
| 42820                                  | Systolic heart failure, unspecified                            | I5033                                   | Acute on chronic diastolic (congestive) heart failure                                  |
| 42821                                  | Acute systolic heart failure                                   | I5040                                   | Unspecified combined systolic (congestive) and diastolic (congestive) heart failure    |
| 42822                                  | Chronic systolic heart failure                                 | I5041                                   | Acute combined systolic (congestive) & diastolic (congestive) heart failure            |
| 42823                                  | Acute on chronic systolic heart failure                        | I5042                                   | Chronic combined systolic (congestive) & diastolic (congestive) heart failure          |
| 42830                                  | Diastolic heart failure, unspecified                           | I5043                                   | Acute on chronic combined systolic (congestive) & diastolic (congestive) heart failure |
| 42831                                  | Acute diastolic heart failure                                  | I509                                    | Heart failure, unspecified                                                             |
| 42832                                  | Chronic diastolic heart failure                                | I501                                    | Left ventricular failure                                                               |
| 42833                                  | Acute on chronic diastolic heart failure                       | I50810                                  | Right heart failure, unspecified                                                       |
| 42840                                  | Combined systolic and diastolic heart failure, unspecified     | I50811                                  | Acute right heart failure                                                              |
| 42841                                  | Acute combined systolic and diastolic heart failure            | I50812                                  | Chronic right heart failure                                                            |
| 42842                                  | Chronic combined systolic and diastolic heart failure          | I50813                                  | Acute on chronic right heart failure                                                   |
| 42843                                  | Acute on chronic combined systolic and diastolic heart failure | I50814                                  | Right heart failure due to left heart failure                                          |
| 4289                                   | Heart failure, unspecified                                     | I5082                                   | Biventricular heart failure                                                            |



| ICD-9-CM<br>Diagnosis<br>Code                                                                                                                            |                                                          | ICD-10-CM<br>Diagnosis<br>Code |                                                                              |
|----------------------------------------------------------------------------------------------------------------------------------------------------------|----------------------------------------------------------|--------------------------------|------------------------------------------------------------------------------|
|                                                                                                                                                          |                                                          | I5083                          | High output heart failure                                                    |
|                                                                                                                                                          |                                                          | I5084                          | End stage heart failure                                                      |
|                                                                                                                                                          |                                                          | I5089                          | Other heart failure                                                          |
| <b>Potentially Avoidable Condition: <i>Chronic Obstructive Pulmonary Disease (COPD)</i> (including emphysema and asthma; excluding acute bronchitis)</b> |                                                          |                                |                                                                              |
| <b><i>COPD (excluding acute bronchitis) diagnosis codes</i></b>                                                                                          |                                                          |                                |                                                                              |
| 4910                                                                                                                                                     | Simple chronic bronchitis                                | J410                           | Simple chronic bronchitis                                                    |
| 4911                                                                                                                                                     | Mucopurulent chronic bronchitis                          | J411                           | Mucopurulent chronic bronchitis                                              |
| 49120                                                                                                                                                    | Obstructive chronic bronchitis without exacerbation      | J418                           | Mixed simple and mucopurulent chronic bronchitis                             |
| 49121                                                                                                                                                    | Obstructive chronic bronchitis with (acute) exacerbation | J42                            | Unspecified chronic bronchitis                                               |
| 49122                                                                                                                                                    | Obstructive chronic bronchitis with acute bronchitis     | J430                           | Unilateral pulmonary emphysema [MacLeod's syndrome]                          |
| 4918                                                                                                                                                     | Other chronic bronchitis                                 | J431                           | Panlobular emphysema                                                         |
| 4919                                                                                                                                                     | Unspecified chronic bronchitis                           | J432                           | Centrilobular emphysema                                                      |
| 4920                                                                                                                                                     | Emphysematous bleb                                       | J438                           | Other emphysema                                                              |
| 4928                                                                                                                                                     | Other emphysema                                          | J439                           | Emphysema, unspecified                                                       |
| 494                                                                                                                                                      | Bronchiectasis                                           | J440                           | Chronic obstructive pulmonary disease with acute lower respiratory infection |
| 4940                                                                                                                                                     | Bronchiectasis without acute exacerbation                | J441                           | Chronic obstructive pulmonary disease with (acute) exacerbation              |
| 4941                                                                                                                                                     | Bronchiectasis with acute exacerbation                   | J449                           | Chronic obstructive pulmonary disease, unspecified                           |
| 496                                                                                                                                                      | Chronic airway obstruction, not elsewhere classified     | J470                           | Bronchiectasis with acute lower respiratory infection                        |
|                                                                                                                                                          |                                                          | J471                           | Bronchiectasis with (acute) exacerbation                                     |

| ICD-9-CM<br>Diagnosis<br>Code        |                                                      | ICD-10-CM<br>Diagnosis<br>Code |                                                      |
|--------------------------------------|------------------------------------------------------|--------------------------------|------------------------------------------------------|
|                                      |                                                      | J479                           | Bronchiectasis, uncomplicated                        |
| <b><i>Asthma diagnosis codes</i></b> |                                                      |                                |                                                      |
| 49300                                | Extrinsic asthma, unspecified                        | J4521                          | Mild intermittent asthma with (acute) exacerbation   |
| 49301                                | Extrinsic asthma with status asthmaticus             | J4522                          | Mild intermittent asthma with status asthmaticus     |
| 49302                                | Extrinsic asthma with (acute) exacerbation           | J4531                          | Mild persistent asthma with (acute) exacerbation     |
| 49310                                | Intrinsic asthma, unspecified                        | J4532                          | Mild persistent asthma with status asthmaticus       |
| 49311                                | Intrinsic asthma with status asthmaticus             | J4541                          | Moderate persistent asthma with (acute) exacerbation |
| 49312                                | Intrinsic asthma with (acute) exacerbation           | J4542                          | Moderate persistent asthma with status asthmaticus   |
| 49320                                | Chronic obstructive asthma, unspecified              | J4551                          | Severe persistent asthma with (acute) exacerbation   |
| 49321                                | Chronic obstructive asthma with status asthmaticus   | J4552                          | Severe persistent asthma with status asthmaticus     |
| 49322                                | Chronic obstructive asthma with (acute) exacerbation | J45901                         | Unspecified asthma with (acute) exacerbation         |
| 49381                                | Exercise induced bronchospasm                        | J45902                         | Unspecified asthma with status asthmaticus           |
| 49382                                | Cough variant asthma                                 | J45990                         | Exercise induced bronchospasm                        |
| 49390                                | Asthma, unspecified type, unspecified                | J45991                         | Cough variant asthma                                 |
| 49391                                | Asthma, unspecified type, with status asthmaticus    | J45998                         | Other asthma                                         |
| 49392                                | Asthma, unspecified type, with (acute) exacerbation  |                                |                                                      |

| ICD-9-CM<br>Diagnosis<br>Code                                                                                                                                                                                  |                                                                        | ICD-10-CM<br>Diagnosis<br>Code |                                                                    |
|----------------------------------------------------------------------------------------------------------------------------------------------------------------------------------------------------------------|------------------------------------------------------------------------|--------------------------------|--------------------------------------------------------------------|
| <b>Serious Bone Fractures: Pelvis, Hip, Long Bones of Arms (Humerus, Ulna, Radius) and Legs (Femur, Tibia, Fibula), Wrists and Ankles (x – denotes the entire 7 digit code series included, i.e., S720xxx)</b> |                                                                        |                                |                                                                    |
| 82000                                                                                                                                                                                                          | Closed fracture of intracapsular section of neck of femur, unspecified | S720x                          | Fracture of head and neck of femur                                 |
| 82001                                                                                                                                                                                                          | Closed fracture of epiphysis (separation) (upper) of neck of femur     | S721x                          | Petrochanteric fracture                                            |
| 82002                                                                                                                                                                                                          | Closed fracture of midcervical section of neck of femur                | S722x                          | Subtrochanteric fracture                                           |
| 82003                                                                                                                                                                                                          | Closed fracture of base of neck of femur                               | S723x                          | Fracture of shaft of femur                                         |
| 82009                                                                                                                                                                                                          | Other closed transcervical fracture of neck of femur                   | S724x                          | Fracture of lower end of femur                                     |
| 82010                                                                                                                                                                                                          | Open fracture of intracapsular section of neck of femur, unspecified   | S728x                          | Other fracture of femur                                            |
| 82011                                                                                                                                                                                                          | Open fracture of epiphysis (separation) (upper) of neck of femur       | S729x                          | Unspecified fracture of femur                                      |
| 82012                                                                                                                                                                                                          | Open fracture of midcervical section of neck of femur                  |                                |                                                                    |
| 82013                                                                                                                                                                                                          | Open fracture of base of neck of femur                                 | S422x                          | Fracture of upper end of humerus                                   |
| 82019                                                                                                                                                                                                          | Other open transcervical fracture of neck of femur                     | S423x                          | Fracture of shaft of humerus                                       |
| 82020                                                                                                                                                                                                          | Closed fracture of trochanteric section of neck of femur               | S424x                          | Fracture of lower end of humerus                                   |
| 82021                                                                                                                                                                                                          | Closed fracture of intertrochanteric section of neck of femur          | S429x                          | Fracture of shoulder girdle, part unspecified<br>part unspecified, |

| <b>ICD-9-CM<br/>Diagnosis<br/>Code</b> |                                                                     | <b>ICD-10-CM<br/>Diagnosis<br/>Code</b> |                                                                                                            |
|----------------------------------------|---------------------------------------------------------------------|-----------------------------------------|------------------------------------------------------------------------------------------------------------|
| 82022                                  | Closed fracture of subtrochanteric section of neck of femur         |                                         |                                                                                                            |
| 82030                                  | Open fracture of trochanteric section of neck of femur, unspecified | S520x                                   | Fracture of upper end of ulna                                                                              |
| 82031                                  | Open fracture of intertrochanteric section of neck of femur         | S521x                                   | Fracture of upper end of radius                                                                            |
| 82032                                  | Open fracture of subtrochanteric section of neck of femur           | S522x                                   | Fracture of shaft of ulna                                                                                  |
| 8208                                   | Closed fracture of unspecified part of neck of femur                | S523x                                   | Fracture of shaft of radius                                                                                |
| 8209                                   | Open fracture of unspecified part of neck of femur                  | S525x                                   | Fracture of lower end of radius                                                                            |
| 8210                                   | Shaft or unspecified part, closed                                   | S526x                                   | Fracture of lower end of ulna                                                                              |
| 82100                                  | Unspecified part of femur, closed                                   | S529x                                   | Unspecified fracture of forearm                                                                            |
| 82101                                  | Shaft, closed                                                       |                                         |                                                                                                            |
| 8211                                   | Shaft or unspecified part, open                                     | S620x                                   | Fracture of navicular [scaphoid] bone of wrist                                                             |
| 82110                                  | Unspecified part of femur, open                                     | S621x                                   | Fracture of other and unspecified carpal bone(s), triquetrum, lunate, capitate, hamate, pisiform trapezoid |
| 82111                                  | Shaft, open                                                         |                                         |                                                                                                            |
| 8212                                   | Lower end, closed                                                   | S820x                                   | Fracture of patella                                                                                        |
| 82120                                  | Lower end, unspecified part, closed                                 | S821x                                   | Fracture of upper end of tibia                                                                             |
| 82121                                  | Condyle, femoral, closed                                            | S822x                                   | Fracture of shaft of tibia                                                                                 |
| 82122                                  | Epiphysis, lower (separation), closed                               | S823x                                   | Fracture of lower end of tibia                                                                             |

| <b>ICD-9-CM<br/>Diagnosis<br/>Code</b> |                                                 | <b>ICD-10-CM<br/>Diagnosis<br/>Code</b> |                                                                    |
|----------------------------------------|-------------------------------------------------|-----------------------------------------|--------------------------------------------------------------------|
| 82123                                  | Supracondylar fracture of femur, closed         | S824x                                   | Fracture of shaft of fibula                                        |
| 82129                                  | Other, multiple fractures lower end, closed     | S825x                                   | Fracture of medial malleolus (ankle)                               |
| 8213                                   | Lower end, open                                 | S826x                                   | Fracture of lateral malleolus                                      |
| 82130                                  | Lower end, unspecified part, open               | S828x                                   | Other fractures of lower leg                                       |
| 82131                                  | Condyle, femoral, open                          | S829x                                   | Unspecified fracture of lower leg                                  |
| 82132                                  | Epiphysis, lower (separation), open             |                                         |                                                                    |
| 82133                                  | Supracondylar fracture of femur, open           | S323x                                   | Fracture of ilium                                                  |
| 82139                                  | Other, multiple fractures lower end, open       | S324x                                   | Fracture of acetabulum                                             |
|                                        |                                                 | S325x                                   | Fracture of pubis                                                  |
| 8220                                   | Fracture of patella, closed                     | S326x                                   | Fracture of ischium                                                |
| 8221                                   | Fracture of patella, open                       | S328x                                   | Fracture of other parts of pelvis, multiple fractures of pelvis    |
|                                        |                                                 | S329x                                   | Fracture of unspecified parts of lumbosacral spine and pelvis, NOS |
| 8230                                   | Fracture of tibia and fibula, upper end, closed |                                         |                                                                    |
| 82300                                  | Upper end, tibia alone, closed                  |                                         |                                                                    |
| 82301                                  | Upper end, fibula alone, closed                 |                                         |                                                                    |
| 82302                                  | Upper end, tibia and fibula, closed             |                                         |                                                                    |
| 8231                                   | Fracture of tibia and fibula, upper end, open   |                                         |                                                                    |
| 82310                                  | Upper end, tibia alone, open                    |                                         |                                                                    |
| 82311                                  | Upper end, fibula alone, open                   |                                         |                                                                    |

| <b>ICD-9-CM<br/>Diagnosis<br/>Code</b> |                                                      | <b>ICD-10-CM<br/>Diagnosis<br/>Code</b> |  |
|----------------------------------------|------------------------------------------------------|-----------------------------------------|--|
| 82312                                  | Upper end, tibia and fibula, open                    |                                         |  |
| 8232                                   | Shaft, closed                                        |                                         |  |
| 82320                                  | Shaft, tibia alone, closed                           |                                         |  |
| 82321                                  | Shaft, fibula alone, closed                          |                                         |  |
| 82322                                  | Shaft, tibia and fibula, closed                      |                                         |  |
| 8233                                   | Shaft, open                                          |                                         |  |
| 82330                                  | Shaft, tibia alone, open                             |                                         |  |
| 82331                                  | Shaft, fibula alone, open                            |                                         |  |
| 82332                                  | Shaft, tibia and fibula, open                        |                                         |  |
| 8234                                   | Torus fracture                                       |                                         |  |
| 82340                                  | Torus fracture, tibia alone                          |                                         |  |
| 82341                                  | Torus fracture, fibula alone                         |                                         |  |
| 82342                                  | Torus fracture, tibia and fibula                     |                                         |  |
| 8238                                   | Lower leg fracture, NOS, closed                      |                                         |  |
| 82380                                  | Lower leg fracture, tibia alone,<br>NOS, closed      |                                         |  |
| 82381                                  | Lower leg fracture, fibula alone,<br>NOS, closed     |                                         |  |
| 82382                                  | Lower leg fracture, tibia and<br>fibula, NOS, closed |                                         |  |
| 8239                                   | Lower leg fracture, NOS, open                        |                                         |  |
| 82390                                  | Lower leg fracture, tibia alone,<br>NOS, open        |                                         |  |
| 82391                                  | Lower leg fracture, fibula alone,<br>NOS, open       |                                         |  |
| 82392                                  | Lower leg fracture, tibia and<br>fibula, NOS, open   |                                         |  |
| 8240                                   | Medial malleolus, closed (Ankle)                     |                                         |  |

| <b>ICD-9-CM<br/>Diagnosis<br/>Code</b> |                                                             | <b>ICD-10-CM<br/>Diagnosis<br/>Code</b> |  |
|----------------------------------------|-------------------------------------------------------------|-----------------------------------------|--|
| 8241                                   | Medial malleolus, open                                      |                                         |  |
| 8242                                   | Lateral malleolus, closed                                   |                                         |  |
| 8243                                   | Lateral malleolus, open                                     |                                         |  |
| 8244                                   | Bimalleolar, closed (Dypuytren's fracture, Pott's Fracture) |                                         |  |
| 8245                                   | Bimalleolar, open                                           |                                         |  |
| 8246                                   | Trimalleolar, closed                                        |                                         |  |
| 8247                                   | Trimalleolar, open                                          |                                         |  |
| 8248                                   | Ankle, NOS, closed                                          |                                         |  |
| 8249                                   | Ankle, NOS, open                                            |                                         |  |
| 8120                                   | Fracture of humerus, upper end, closed                      |                                         |  |
| 81200                                  | Fracture of humerus, upper end, closed                      |                                         |  |
| 81201                                  | Fracture Neck of humerus NOS, closed                        |                                         |  |
| 81202                                  | Fracture anatomical neck, closed                            |                                         |  |
| 81203                                  | Fracture greater tuberosity, closed                         |                                         |  |
| 81209                                  | Fracture Other Head, closed                                 |                                         |  |
| 8121                                   | Fracture of humerus, upper end, open                        |                                         |  |
| 81210                                  | Fracture of humerus, upper end, open                        |                                         |  |
| 81211                                  | Fracture Neck of humerus NOS, open                          |                                         |  |
| 81212                                  | Fracture anatomical neck, open                              |                                         |  |
| 81213                                  | Fracture greater tuberosity, open                           |                                         |  |

| <b>ICD-9-CM<br/>Diagnosis<br/>Code</b> |                                                       | <b>ICD-10-CM<br/>Diagnosis<br/>Code</b> |  |
|----------------------------------------|-------------------------------------------------------|-----------------------------------------|--|
| 81219                                  | Fracture Other Head, open                             |                                         |  |
| 8122                                   | Fracture Shaft or unspecified part, closed            |                                         |  |
| 81220                                  | Fracture of humerus, NOS, closed                      |                                         |  |
| 81221                                  | Fracture Shaft of humerus, closed                     |                                         |  |
| 8123                                   | Fracture Shaft or unspecified part, open              |                                         |  |
| 81230                                  | Fracture of humerus, NOS, open                        |                                         |  |
| 81231                                  | Fracture Shaft of humerus, open                       |                                         |  |
| 8124                                   | Fracture of humerus, distal end, closed               |                                         |  |
| 81240                                  | Fracture of humerus, lower end, unspecified, closed   |                                         |  |
| 81241                                  | Supracondylar fracture of humerus closed              |                                         |  |
| 81242                                  | Fracture humerus, Lateral condyle, closed             |                                         |  |
| 81243                                  | Fracture humerus, Medial condyle, closed              |                                         |  |
| 81244                                  | Fracture humerus, Condyle, unspecified, closed        |                                         |  |
| 81249                                  | Other multiple fractures lower end & trochlea, closed |                                         |  |
| 8125                                   | Fracture of humerus, distal end, open                 |                                         |  |
| 81250                                  | Fracture of humerus, lower end, unspecified, open     |                                         |  |
| 81251                                  | Supracondylar fracture of humerus open                |                                         |  |



| <b>ICD-9-CM<br/>Diagnosis<br/>Code</b> |                                                                                                                    | <b>ICD-10-CM<br/>Diagnosis<br/>Code</b> |  |
|----------------------------------------|--------------------------------------------------------------------------------------------------------------------|-----------------------------------------|--|
| 81252                                  | Fracture humerus, Lateral condyle, open                                                                            |                                         |  |
| 81253                                  | Fracture humerus, Medial condyle, open                                                                             |                                         |  |
| 81254                                  | Fracture humerus, Condyle, unspecified, open                                                                       |                                         |  |
| 81259                                  | Other multiple fractures lower end & trochlea, open                                                                |                                         |  |
| 8130                                   | Fracture of radius and ulna, Upper End, closed                                                                     |                                         |  |
| 81300                                  | Fracture Upper end of forearm unspecified, closed                                                                  |                                         |  |
| 81301                                  | Olecranon process of ulna, closed                                                                                  |                                         |  |
| 81302                                  | Coronoid process of ulna, closed                                                                                   |                                         |  |
| 81303                                  | Monteggia's fracture, closed                                                                                       |                                         |  |
| 81304                                  | Monteggia's fracture, Multiple fractures of ulna, upper end, closed                                                |                                         |  |
| 81305                                  | Fracture head of radius, closed                                                                                    |                                         |  |
| 81306                                  | Fracture Neck of radius, closed                                                                                    |                                         |  |
| 81307                                  | Other and unspecified fractures of proximal end of radius (alone), Multiple fractures of radius, upper end, closed |                                         |  |
| 81308                                  | Radius with ulna, upper end [any part], closed                                                                     |                                         |  |
| 8130                                   | Fracture of radius and ulna, Upper End, closed                                                                     |                                         |  |
| 81310                                  | Fracture Upper end of forearm unspecified, open                                                                    |                                         |  |
| 81311                                  | Olecranon process of ulna, open                                                                                    |                                         |  |

| <b>ICD-9-CM<br/>Diagnosis<br/>Code</b> |                                                                                                                  | <b>ICD-10-CM<br/>Diagnosis<br/>Code</b> |  |
|----------------------------------------|------------------------------------------------------------------------------------------------------------------|-----------------------------------------|--|
| 81312                                  | Coronoid process of ulna, open                                                                                   |                                         |  |
| 81313                                  | Monteggia's fracture, open                                                                                       |                                         |  |
| 81314                                  | Monteggia's fracture, Multiple fractures of ulna, upper end, open                                                |                                         |  |
| 81315                                  | Fracture head of radius, open                                                                                    |                                         |  |
| 81316                                  | Fracture Neck of radius, open                                                                                    |                                         |  |
| 81317                                  | Other and unspecified fractures of proximal end of radius (alone), Multiple fractures of radius, upper end, open |                                         |  |
| 81318                                  | Radius with ulna, upper end [any part], open                                                                     |                                         |  |
| 8132                                   | Fracture of Shaft, closed                                                                                        |                                         |  |
| 81320                                  | Fracture of Shaft Unspecified, closed                                                                            |                                         |  |
| 81321                                  | Fracture of Radius (alone), closed                                                                               |                                         |  |
| 81322                                  | Fracture of Ulna (alone), closed                                                                                 |                                         |  |
| 81323                                  | Fracture of Radius with Ulna, closed                                                                             |                                         |  |
| 8133                                   | Fracture of Shaft, open                                                                                          |                                         |  |
| 81330                                  | Fracture of Shaft Unspecified, open                                                                              |                                         |  |
| 81331                                  | Fracture of Radius (alone), open                                                                                 |                                         |  |
| 81332                                  | Fracture of Ulna (alone), open                                                                                   |                                         |  |
| 81333                                  | Fracture of Radius with Ulna, open                                                                               |                                         |  |
| 8134                                   | Fracture of Lower end, closed                                                                                    |                                         |  |
| 81340                                  | Fracture of Lower end of forearm, unspecified, closed                                                            |                                         |  |

| <b>ICD-9-CM<br/>Diagnosis<br/>Code</b> |                                                         | <b>ICD-10-CM<br/>Diagnosis<br/>Code</b> |  |
|----------------------------------------|---------------------------------------------------------|-----------------------------------------|--|
| 81341                                  | Colles' fracture / Smiths fracture, closed              |                                         |  |
| 81342                                  | Other fractures of distal end of radius (alone), closed |                                         |  |
| 81343                                  | Fracture Distal end of ulna (alone), closed             |                                         |  |
| 81344                                  | Fracture Radius with ulna, lower end, closed            |                                         |  |
| 81345                                  | Fracture Torus fracture of radius (alone), closed       |                                         |  |
| 81346                                  | Fracture Torus fracture of ulna, closed                 |                                         |  |
| 81347                                  | Fracture Torus fracture of radius and ulna, closed      |                                         |  |
| 8135                                   | Fracture of Lower end, open                             |                                         |  |
| 81350                                  | Fracture of Lower end of forearm, unspecified, open     |                                         |  |
| 81351                                  | Colles' fracture, open                                  |                                         |  |
| 81352                                  | Other fractures of distal end of radius (alone), open   |                                         |  |
| 81353                                  | Fracture Distal end of ulna (alone), open               |                                         |  |
| 81354                                  | Fracture Radius with ulna, lower end, open              |                                         |  |
| 8138                                   | Fracture Unspecified part, closed                       |                                         |  |
| 81380                                  | Fracture of forearm, unspecified, closed                |                                         |  |
| 81381                                  | Fracture of radius (alone) NOS, closed                  |                                         |  |
| 81382                                  | Fracture of ulna (alone) NOS, closed                    |                                         |  |

| <b>ICD-9-CM<br/>Diagnosis<br/>Code</b> |                                                          | <b>ICD-10-CM<br/>Diagnosis<br/>Code</b> |  |
|----------------------------------------|----------------------------------------------------------|-----------------------------------------|--|
| 81383                                  | Fracture radius with ulna NOS, closed                    |                                         |  |
| 8139                                   | Fracture Unspecified part, open                          |                                         |  |
| 81390                                  | Fracture of forearm, unspecified, open                   |                                         |  |
| 81391                                  | Fracture of radius (alone) NOS, open                     |                                         |  |
| 81392                                  | Fracture of ulna (alone) NOS, open                       |                                         |  |
| 81393                                  | Fracture radius with ulna NOS, open                      |                                         |  |
| 81406                                  | Fracture of trapezium bone [smaller multangular], closed |                                         |  |
| 81407                                  | Fracture of capitate bone [os magnum], closed            |                                         |  |
| 81408                                  | Fracture of hamate [unciform] bone, closed               |                                         |  |
| 81409                                  | Fracture of other carpal bone, closed                    |                                         |  |
| 81410                                  | Fracture of carpal bone wrist NOS, open                  |                                         |  |
| 81411                                  | Fracture of navicular (scaphoid) of wrist, open          |                                         |  |
| 81412                                  | Fracture of lunate [semilunar] bone of wrist, open       |                                         |  |
| 81413                                  | Fracture of triquetral [cuneiform] bone of wrist, open   |                                         |  |
| 81414                                  | Fracture of pisiform, open                               |                                         |  |
| 81415                                  | Fracture of trapezium bone [larger multangular], open    |                                         |  |
| 81416                                  | Fracture of trapezium bone [smaller multangular], open   |                                         |  |

| <b>ICD-9-CM<br/>Diagnosis<br/>Code</b> |                                                                      | <b>ICD-10-CM<br/>Diagnosis<br/>Code</b> |  |
|----------------------------------------|----------------------------------------------------------------------|-----------------------------------------|--|
| 81417                                  | Fracture of capitate bone [os magnum], open                          |                                         |  |
| 81418                                  | Fracture of hamate [unciform] bone, open                             |                                         |  |
| 81419                                  | Fracture of other carpal bone, open                                  |                                         |  |
| 8080                                   | Fracture of Pelvis, Acetabulum, closed                               |                                         |  |
| 8081                                   | Fracture of Pelvis, Acetabulum, open                                 |                                         |  |
| 8082                                   | Fracture of Pelvis, Pubis, closed                                    |                                         |  |
| 8083                                   | Fracture of Pelvis, Pubis, open                                      |                                         |  |
| 8084                                   | Fracture of Other specified part, closed                             |                                         |  |
| 80841                                  | Fracture of ilium, closed                                            |                                         |  |
| 80842                                  | Fracture of Ischium, closed                                          |                                         |  |
| 80843                                  | Multiple closed pelvic fractures with disruption of pelvic circle    |                                         |  |
| 80844                                  | Multiple closed pelvic fractures without disruption of pelvic circle |                                         |  |
| 80849                                  | Other innonminate bone, pelvic rim, closed                           |                                         |  |
| 8085                                   | Fracture of Other specified part, open                               |                                         |  |
| 80851                                  | Fracture of ilium, open                                              |                                         |  |
| 80852                                  | Fracture of Ischium, open                                            |                                         |  |
| 80853                                  | Multiple open pelvic fractures with disruption of pelvic circle      |                                         |  |
| 80854                                  | Multiple open pelvic fractures without disruption of pelvic circle   |                                         |  |

| ICD-9-CM<br>Diagnosis<br>Code |                                          | ICD-10-CM<br>Diagnosis<br>Code |  |
|-------------------------------|------------------------------------------|--------------------------------|--|
| 80859                         | Other innonminate bone, pelvic rim, open |                                |  |
| 8088                          | Unspecified closed fracture of pelvis    |                                |  |
| 8089                          | Unspecified open fracture of pelvis      |                                |  |

**eTable 2. Total Number of Hospital Transfers Among Nursing Home Residents With Advanced Illness by Cohort Year**

| Hospital Transfer Outcome                                | Cohort Year |        |        |        |        |        |
|----------------------------------------------------------|-------------|--------|--------|--------|--------|--------|
|                                                          | 2011        | 2012   | 2013   | 2014   | 2015   | 2016   |
| <b>Advanced Dementia</b>                                 |             |        |        |        |        |        |
| All-cause, n                                             | 22,961      | 48,011 | 47,561 | 47,930 | 47,661 | 47,068 |
| Potentially avoidable, n                                 | 7,591       | 15,436 | 14,865 | 14,992 | 14,997 | 15,188 |
| Percent of all transfers that were potentially avoidable | 33.0%       | 32.1%  | 31.2%  | 31.2%  | 31.4%  | 32.3%  |
| <b>Advanced Chronic Heart Failure</b>                    |             |        |        |        |        |        |
| All-cause, n                                             | 25,516      | 40,105 | 39,314 | 37,209 | 38,566 | 42,892 |
| Potentially avoidable, n                                 | 10,659      | 15,915 | 14,787 | 14,450 | 15,166 | 17,761 |
| Percent of all transfers that were potentially avoidable | 41.8%       | 39.7%  | 37.6%  | 38.8%  | 39.3%  | 41.4%  |
| <b>Advanced Chronic Obstructive Pulmonary Disease</b>    |             |        |        |        |        |        |
| All-cause transfers                                      | 25083       | 40558  | 39426  | 37120  | 38508  | 42607  |
| Potentially Avoidable                                    | 10513       | 15980  | 14805  | 14333  | 14840  | 17061  |
| Percent of all transfers that were potentially avoidable | 41.9%       | 39.4%  | 37.6%  | 38.6%  | 38.5%  | 40.0%  |

**eFigure. Percent of All Transfers That Were Potentially Avoidable by Cohort Year**

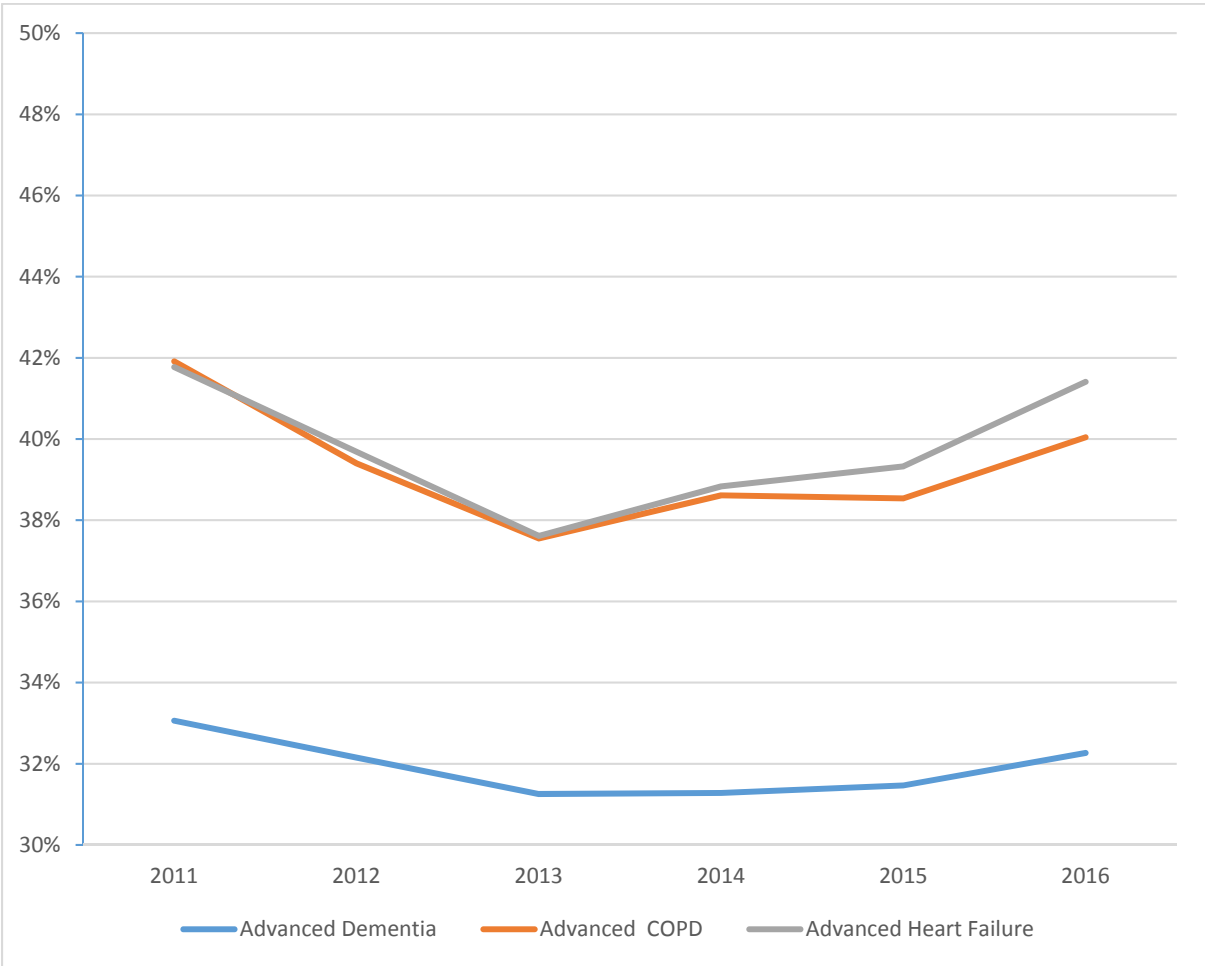

Supplement: jamainternmed-180-385-s001.pdf [file jamainternmed-180-385-s001.pdf]
